# Supplementary material for: Variant-Specific Analysis Reveals a Novel Long-Range RNA-RNA Interaction in SARS-CoV-2 Orf1a
Source: MDPI journal article supplement (doi:10.3390/ijms231911050), 2022-09-21
Supplement: s1 [file s1]

**Table S1.** Number of Sequences from each Country.

| Country                | Number of Sequences |
|------------------------|---------------------|
| France                 | 8593                |
| Italy                  | 3296                |
| USA                    | 2296                |
| Mexico                 | 2269                |
| Philippines            | 1787                |
| Belgium                | 1346                |
| Estonia                | 1214                |
| Bulgaria               | 1161                |
| Czech Republic         | 1131                |
| Austria                | 1059                |
| India                  | 1019                |
| Romania                | 859                 |
| Spain                  | 824                 |
| Cambodia               | 717                 |
| Malaysia               | 575                 |
| Reunion                | 434                 |
| Hong Kong              | 409                 |
| Costa Rica             | 365                 |
| Mayotte                | 354                 |
| Lithuania              | 307                 |
| Slovakia               | 258                 |
| Indonesia              | 244                 |
| Iran                   | 182                 |
| Botswana               | 180                 |
| Japan                  | 163                 |
| Canada                 | 125                 |
| Vietnam                | 96                  |
| Switzerland            | 94                  |
| Bangladesh             | 89                  |
| Brazil                 | 85                  |
| Bosnia and Herzegovina | 77                  |
| Poland                 | 69                  |
| South Africa           | 69                  |
| Zambia                 | 61                  |
| Ghana                  | 54                  |
| Guadeloupe             | 49                  |
| Nigeria                | 47                  |
| Iraq                   | 45                  |
| Kenya                  | 40                  |
| Monaco                 | 35                  |
| Singapore              | 35                  |
| Russia                 | 34                  |
| United Arab Emirates   | 33                  |
| French Guiana          | 31                  |

|                 |    |
|-----------------|----|
| Uzbekistan      | 31 |
| Kosovo          | 30 |
| Kuwait          | 30 |
| Puerto Rico     | 28 |
| Thailand        | 28 |
| Maldives        | 27 |
| Ukraine         | 27 |
| China           | 25 |
| Pakistan        | 24 |
| Turkey          | 23 |
| North Macedonia | 22 |
| Taiwan          | 17 |
| Ireland         | 16 |
| Mauritius       | 15 |
| Brunei          | 12 |
| Saudi Arabia    | 12 |
| Togo            | 12 |
| Gambia          | 11 |
| Martinique      | 11 |
| Montenegro      | 11 |
| Germany         | 9  |
| Malawi          | 8  |
| Slovenia        | 7  |
| Hungary         | 6  |
| Nepal           | 6  |
| Sri Lanka       | 6  |
| Andorra         | 5  |
| Cameroon        | 4  |
| Chile           | 4  |
| Guatemala       | 4  |
| Tunisia         | 4  |
| Colombia        | 3  |
| Greece          | 3  |
| Morocco         | 3  |
| Serbia          | 3  |
| South Korea     | 3  |
| Ecuador         | 2  |
| Saint Martin    | 2  |
| Argentina       | 1  |
| Belarus         | 1  |
| Benin           | 1  |
| Cabo Verde      | 1  |
| Canary Islands  | 1  |
| Egypt           | 1  |
| Jordan          | 1  |
| Moldova         | 1  |

|           |   |
|-----------|---|
| Nicaragua | 1 |
| Oman      | 1 |
|           |   |
